# Supplementary material for: Revising the definition of anthropogenic heat flux from buildings: role of human activities and building storage heat flux
Source: Copernicus journal article supplement (doi:10.5194/acp-22-4721-2022), 2022-04-12
Supplement: Supplementary file 1 [file acp-22-4721-2022-supplement.zip]

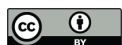

*Supplement of*

**Revising the definition of anthropogenic heat flux from buildings: role of human activities and building storage heat flux**

**Yiqing Liu et al.**

*Correspondence to:* Zhiwen Luo (z.luo@reading.ac.uk) and Sue Grimmond (c.s.grimmond@reading.ac.uk)

- [acp-22-4721-2022-supplement-title-page.pdf](#)
- [acp-2021-914-Supplementary-material-Liu-et-al.docx](#)

The copyright of individual parts of the supplement might differ from the article licence.
